# Supplementary material
Source: PubMed Central journal article supplement (PMC3415539)
Supplement: mmc1.pdf [file mmc1.pdf]

The American Journal of Human Genetics, Volume 91

## **Supplemental Data**

### **De Novo Mutations in *MLL* Cause**

### **Wiedemann-Steiner Syndrome**

Wendy D. Jones, Dimitra Dafou, Meriel McEntagart, Wesley J. Woollard, Frances V. Elmslie, Muriel Holder-Espinasse, Melita Irving, Anand K. Saggar, Sarah Smithson, Richard C. Trembath, Charu Deshpande, and Michael A. Simpson

**Table S1. Summary Statistics for Exome Sequencing of Individuals WSS-1, WSS-2, WSS-3, and WSS-4—Mapping and Coverage**

| Sequenced Exomes                           | WSS-1     | WSS-2     | WSS-3     | WSS-4    |
|--------------------------------------------|-----------|-----------|-----------|----------|
| Uniquely mapped reads                      | 149672116 | 123768103 | 111861056 | 65553565 |
| Uniquely mapped to target +/- 150 bp reads | 135685098 | 92434932  | 101443367 | 59376585 |
| Uniquely mapped to target reads            | 122887592 | 83506832  | 89792243  | 54022042 |
| Gencode bases with coverage >1x            | 99.6      | 99.47     | 99.32     | 99.08    |
| Gencode bases with coverage >5x            | 98.18     | 97.79     | 97.52     | 96.18    |
| Gencode bases with coverage >10x           | 96.65     | 95.75     | 95.54     | 93.11    |
| Gencode bases with coverage >20x           | 93.95     | 92.19     | 92.14     | 87.87    |
| Mean coverage                              | 212.52    | 144.48    | 154.33    | 93.5     |

Total number of mapped reads and resulting coverage of the Gencode exome.

**Table S2. Summary Statistics for Exome Sequencing—Variant Calling**

|                         | WSS-1 |       | WSS-2 |       | WSS-3 |       | WSS-4 |       |
|-------------------------|-------|-------|-------|-------|-------|-------|-------|-------|
|                         | known | novel | known | novel | known | novel | known | novel |
| All variants            | 20211 | 135   | 24561 | 219   | 24472 | 229   | 21579 | 175   |
| heterozygous            | 11944 | 134   | 15105 | 216   | 14964 | 225   | 12952 | 172   |
| homozygous              | 8267  | 1     | 9456  | 3     | 9508  | 4     | 8627  | 3     |
| Indels                  | 284   | 8     | 449   | 12    | 442   | 19    | 316   | 11    |
| heterozygous            | 122   | 8     | 226   | 9     | 229   | 18    | 151   | 10    |
| homozygous              | 162   | 0     | 223   | 3     | 213   | 1     | 165   | 1     |
| 3n indels               | 148   | 3     | 252   | 8     | 252   | 15    | 165   | 7     |
| heterozygous            | 81    | 3     | 163   | 6     | 161   | 14    | 96    | 6     |
| homozygous              | 67    | 0     | 89    | 2     | 91    | 1     | 69    | 1     |
| Non 3n indels           | 136   | 5     | 197   | 4     | 190   | 4     | 151   | 4     |
| heterozygous            | 41    | 5     | 63    | 3     | 68    | 4     | 55    | 4     |
| homozygous              | 95    | 0     | 134   | 1     | 122   | 0     | 96    | 0     |
| SNVs                    | 17660 | 111   | 21203 | 187   | 21100 | 175   | 18842 | 140   |
| heterozygous            | 10550 | 111   | 13112 | 187   | 12917 | 173   | 11370 | 138   |
| homozygous              | 7110  | 0     | 8091  | 0     | 8183  | 2     | 7472  | 2     |
| Synonymous_SNVs         | 9124  | 39    | 11120 | 53    | 11009 | 61    | 9810  | 51    |
| heterozygous            | 5490  | 39    | 6854  | 53    | 6754  | 61    | 5855  | 50    |
| homozygous              | 3634  | 0     | 4266  | 0     | 4255  | 0     | 3955  | 1     |
| Nonsynonymous_SNVs      | 8536  | 72    | 10083 | 134   | 10091 | 114   | 9032  | 89    |
| heterozygous            | 5060  | 72    | 6258  | 134   | 6163  | 112   | 5515  | 88    |
| homozygous              | 3476  | 0     | 3825  | 0     | 3928  | 2     | 3517  | 1     |
| Splice site (10 bp)     | 2249  | 16    | 2871  | 20    | 2896  | 34    | 2399  | 24    |
| heterozygous            | 1259  | 15    | 1743  | 20    | 1795  | 33    | 1419  | 24    |
| homozygous              | 990   | 1     | 1128  | 0     | 1101  | 1     | 980   | 0     |
| Transition:Transversion | 3.08  | 2.51  | 2.99  | 2.24  | 3.04  | 2.63  | 3.05  | 3     |
| heterozygous            | 3.09  | 2.48  | 2.97  | 2.24  | 3.15  | 2.66  | 2.99  | 2.94  |
| homozygous              | 3.06  | n/a   | 3     | n/a   | 2.89  | 1     | 3.16  | n/a   |

Numbers of variants of different classes identified by exome sequencing. SNV - single nucleotide variants, 3n - multiples of three nucleotides

**Table S3. Numbers of Candidate Genes Highlighted by Exome Sequencing**

| <b>Any x of 4 individuals</b>                                                  | <b>1</b> | <b>2</b> | <b>3</b> | <b>4</b> |
|--------------------------------------------------------------------------------|----------|----------|----------|----------|
| Genes with heterozygous NS/SS/I variants                                       | 11,978   | 8095     | 4503     | 1629     |
| Genes with heterozygous NS/SS/I variants not in dbSNP, 1000G or control exomes | 491      | 5        | 1        | 0        |

NS - nonsynonymous, SS - splice site, I - indels
